# Supplementary material
Source: Royal Society of Chemistry journal article supplement (doi:10.1039/d6gc01980c)
Supplement: d6gc01980c1.pdf [file d6gc01980c1.pdf]

## Supporting Information

for

### Life cycle assessment of zein, ethyl lactate and derivative nanofiltration membranes

Claudia Oviedo,<sup>1,2</sup> Akos Cseke,<sup>3</sup> Gyorgy Szekely<sup>1,2,4\*</sup>

<sup>1</sup> Advanced Membranes and Porous Materials Center, Physical Science and Engineering Division (PSE), King Abdullah University of Science and Technology, (KAUST), Thuwal, 23955-6900, Saudi Arabia

<sup>2</sup> Environmental Science and Engineering Program; Biological, Environmental Sciences and Engineering Division (BESE); King Abdullah University of Science and Technology (KAUST), Thuwal, 23955-6900, Saudi Arabia

<sup>3</sup> Department of Mechanical, Materials and Manufacturing Engineering, University of Nottingham, Nottingham, NG7 2RD, United Kingdom

<sup>4</sup> Chemical Engineering Program, Physical Science and Engineering Division (PSE), King Abdullah University of Science and Technology (KAUST), Thuwal, 23955-6900, Saudi Arabia

\*email: gyorgy.szekely@kaust.edu.sa, tel: +966128082769, web: www.SzekelyGroup.com

#### Table of Contents

|      |                                                                                                            |    |
|------|------------------------------------------------------------------------------------------------------------|----|
| 1.   | Life Cycle Inventory .....                                                                                 | 3  |
| 1.1. | Life Cycle Inventory for the extraction of 1 kg of zein (Scenario Z1–Z10).....                             | 3  |
| 1.2. | Life Cycle Inventory for the fabrication of 1 kg of ethyl lactate (Scenario E1-E4).....                    | 14 |
| 1.3. | Life Cycle Inventory for the fabrication of 1 m <sup>2</sup> zein membrane (Scenario M1-M3) .....          | 21 |
| 2.   | Life cycle Impact Assessment (LCIA).....                                                                   | 23 |
| 2.1. | Life Cycle Impact Assessment for the extraction of 1 kg of zein (Scenario Z1-Z9).....                      | 23 |
| 2.2. | Life cycle Impact Assessment (LCIA) for the fabrication of 1 kg of ethyl lactate (Scenario E1-E4) ..       | 25 |
| 2.3. | Life Cycle Impact Assessment for the fabrication of 1 m <sup>2</sup> of zein membrane (Scenario M1-M3) ... | 26 |
| 3.   | References .....                                                                                           | 28 |

#### List of figures

|                                                                                                         |    |
|---------------------------------------------------------------------------------------------------------|----|
| <b>Figure S1.</b> Schematic description of zein extraction from corn by Carter and Reck method.....     | 3  |
| <b>Figure S2.</b> Schematic description of zein extraction from corn based on Cheryan method. ....      | 8  |
| <b>Figure S3.</b> Material and energy intensities for ethyl lactate by Argonne National Laboratory..... | 14 |

#### List of tables

|                                                            |   |
|------------------------------------------------------------|---|
| <b>Table S1.</b> Life Cycle Inventory for Scenario Z1..... | 4 |
| <b>Table S2.</b> Life Cycle Inventory for Scenario Z2..... | 5 |

|                                                                                                                                |    |
|--------------------------------------------------------------------------------------------------------------------------------|----|
| <b>Table S3.</b> Life Cycle Inventory for Scenario Z3.....                                                                     | 6  |
| <b>Table S4.</b> Life Cycle Inventory for Scenario Z4.....                                                                     | 7  |
| <b>Table S5.</b> Life Cycle Inventory for Scenario Z5.....                                                                     | 9  |
| <b>Table S6.</b> Life Cycle Inventory for Scenario Z6.....                                                                     | 10 |
| <b>Table S7.</b> Life Cycle Inventory for Scenario Z7.....                                                                     | 11 |
| <b>Table S8.</b> Life Cycle Inventory for Scenario Z8.....                                                                     | 12 |
| <b>Table S9.</b> Life Cycle Inventory for Scenario Z9.....                                                                     | 13 |
| <b>Table S10.</b> Life Cycle Inventory for Scenario E1.....                                                                    | 15 |
| <b>Table S11.</b> Life Cycle Inventory for Scenario E2.....                                                                    | 16 |
| <b>Table S12.</b> Inventory for the production of lactic acid from corn flour in US, based on Manandhar et al process.[6]..... | 17 |
| <b>Table S13.</b> Life Cycle Inventory for Scenario E3.....                                                                    | 18 |
| <b>Table S14.</b> Life Cycle Inventory for Scenario E4.....                                                                    | 19 |
| <b>Table S15.</b> Inventory for the production of lactic acid from corn stover in US, based on Wang et al. Process [7].....    | 20 |
| <b>Table S16.</b> Life Cycle Inventory for Scenario M1. ....                                                                   | 21 |
| <b>Table S17.</b> Life Cycle Inventory for Scenario M2. ....                                                                   | 21 |
| <b>Table S18.</b> Life Cycle Inventory for Scenario M3. ....                                                                   | 22 |
| <b>Table S19.</b> Global warming potential in kg CO <sub>2</sub> eq. ....                                                      | 23 |
| <b>Table S20.</b> Land use in m <sup>2</sup> a crop eq. ....                                                                   | 23 |
| <b>Table S21.</b> Water consumption in m <sup>3</sup> . ....                                                                   | 24 |
| <b>Table S22.</b> Global warming potential in kg CO <sub>2</sub> eq. ....                                                      | 24 |
| <b>Table S23.</b> Global warming potential in kg CO <sub>2</sub> eq. ....                                                      | 25 |
| <b>Table S24.</b> Land use in m <sup>2</sup> a crop eq. ....                                                                   | 25 |
| <b>Table S25.</b> Water consumption in m <sup>3</sup> . ....                                                                   | 25 |
| <b>Table S26.</b> Global warming potential in kg CO <sub>2</sub> eq. ....                                                      | 26 |
| <b>Table S27.</b> Land use in m <sup>2</sup> a crop eq. ....                                                                   | 26 |
| <b>Table S28.</b> Water consumption in m <sup>3</sup> . ....                                                                   | 27 |

# 1. Life Cycle Inventory

This section is divided in de different scenarios proposed including the processes and the values used in each of them.

## 1.1. Life Cycle Inventory for the extraction of 1 kg of zein (Scenario Z1–Z10)

The processes were modeled using the data reported by Anderson based in Carter et al. Method as shown in Figure 1. Zein was extracted either from corn gluten meal [1] or distillers dried grains with solubles [2] using different solvents.

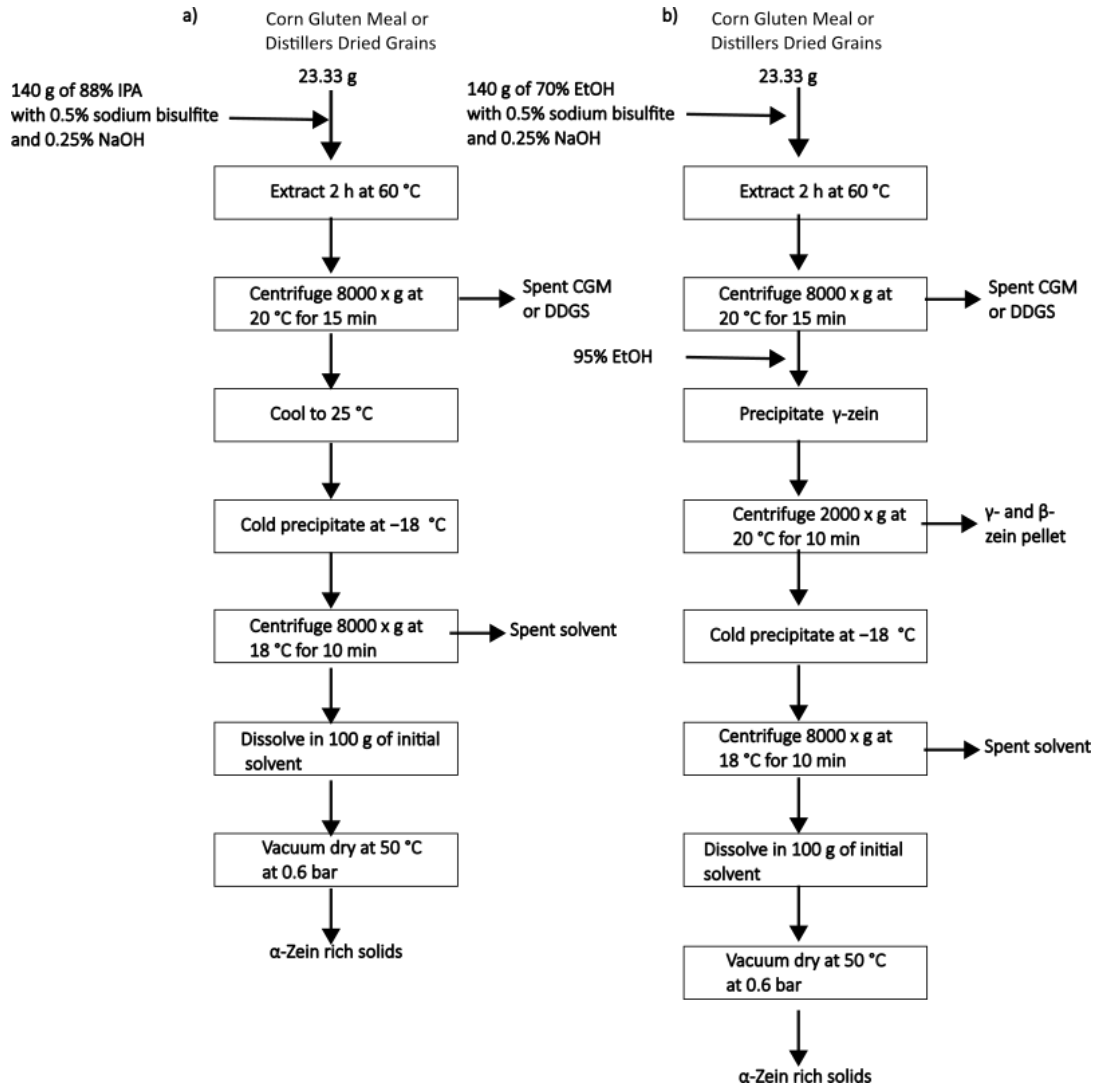

Figure S1. Schematic description of zein extraction from corn by a) Carter and Reck and b) Anderson methods.

**Table S1.** Life Cycle Inventory for Scenario Z1.

| Material or energy | Quantity | Database       | Process Name                                                                                                                            | Comments                   |
|--------------------|----------|----------------|-----------------------------------------------------------------------------------------------------------------------------------------|----------------------------|
| <b>Output</b>      |          |                |                                                                                                                                         |                            |
| Zein Sc Z1         | 5.4 g    |                |                                                                                                                                         |                            |
| Spent solvent      | 240 g    | Ecoinvent v3   | Spent solvent mixture {RoW}  treatment of spent solvent mixture, hazardous waste incineration, with energy recovery, in the waste flows |                            |
| <b>Input</b>       |          |                |                                                                                                                                         |                            |
| Corn Gluten Meal   | 23.3 g   | Agri-footprint | Maize Gluten Meal dried at processing {US} Economic, S                                                                                  |                            |
| Isopropanol        | 211.2 g  | Ecoinvent v3   | Isopropanol {RoW}  market for isopropanol   Cut-off, S                                                                                  |                            |
| Water              | 28.8 g   | Ecoinvent v3   | Tap water {CA-QC}  market group for tap water   Cut-off, S                                                                              |                            |
| Sodium hydroxide   | 0.35 g   | Ecoinvent v3   | Neutralising agent, sodium hydroxide-equivalent {GLO}  soda ash, dense, to generic market for neutralising agent   Cut-off, S           |                            |
| Disodium bisulfite | 0.7 g    | Ecoinvent v3   | Disodium disulphite {GLO}  market for disodium disulphite   Cut-off, S                                                                  | Proxy for sodium disulfite |
| Electricity        | 209 kJ   | Ecoinvent v3   | Electricity, medium voltage {US}   market group for electricity, medium voltage, Cut-off, S                                             |                            |

**Table S2.** Life Cycle Inventory for Scenario Z2.

| Material or energy | Quantity | Database       | Process Name                                                                                                                            | Comments                   |
|--------------------|----------|----------------|-----------------------------------------------------------------------------------------------------------------------------------------|----------------------------|
| <b>Output</b>      |          |                |                                                                                                                                         |                            |
| Zein Sc Z2         | 7.99 g   |                |                                                                                                                                         |                            |
| Spent solvent      | 240 g    | Ecoinvent v3   | Spent solvent mixture {RoW}  treatment of spent solvent mixture, hazardous waste incineration, with energy recovery, in the waste flows |                            |
| <b>Input</b>       |          |                |                                                                                                                                         |                            |
| Corn Gluten Meal   | 23.3 g   | Agri-footprint | Maize Gluten Meal dried at processing {US} Economic, S                                                                                  |                            |
| Ethanol            | 176.84 g | Ecoinvent v3   | Ethanol without water in 95% solution state, from fermentation {US}   ethanol production from maize   Cut-off, S                        |                            |
| Water              | 63.16 g  | Ecoinvent v3   | Tap water {CA-QC}  market group for tap water   Cut-off, S                                                                              |                            |
| Sodium hydroxide   | 0.35 g   | Ecoinvent v3   | Neutralising agent, sodium hydroxide-equivalent {GLO}  soda ash, dense, to generic market for neutralising agent   Cut-off, S           |                            |
| Disodium bisulfite | 0.7 g    | Ecoinvent v3   | Disodium disulphite {GLO}  market for disodium disulphite   Cut-off, S                                                                  | Proxy for sodium disulfite |
| Electricity        | 275 kJ   | Ecoinvent v3   | Electricity, medium voltage {US}   market group for electricity, medium voltage, Cut-off, S                                             |                            |

**Table S3.** Life Cycle Inventory for Scenario Z3.

| Material or energy                           | Quantity | Database     | Process Name                                                                                                                            | Comments                   |
|----------------------------------------------|----------|--------------|-----------------------------------------------------------------------------------------------------------------------------------------|----------------------------|
| <b>Output</b>                                |          |              |                                                                                                                                         |                            |
| Zein Sc Z3                                   | 0.233 g  |              |                                                                                                                                         |                            |
| Spent solvent                                | 240 g    | Ecoinvent v3 | Spent solvent mixture {RoW}  treatment of spent solvent mixture, hazardous waste incineration, with energy recovery, in the waste flows |                            |
| <b>Input</b>                                 |          |              |                                                                                                                                         |                            |
| Distillers Dried Grains with Solubles (DDGS) | 23.3 g   | Ecoinvent v3 | Distillers Dried Grains with Solubles {US}  ethanol production from maize   Cut-off, S                                                  |                            |
| Isopropanol                                  | 211.2 g  | Ecoinvent v3 | Isopropanol {RoW}  market for isopropanol   Cut-off, S                                                                                  |                            |
| Water                                        | 28.8 g   | Ecoinvent v3 | Tap water {CA-QC}  market group for tap water   Cut-off, S                                                                              |                            |
| Sodium hydroxide                             | 0.35 g   | Ecoinvent v3 | Neutralising agent, sodium hydroxide-equivalent {GLO}  soda ash, dense, to generic market for neutralising agent   Cut-off, S           |                            |
| Disodium bisulfite                           | 0.7 g    | Ecoinvent v3 | Disodium disulphite {GLO}  market for disodium disulphite   Cut-off, S                                                                  | Proxy for sodium disulfite |
| Electricity                                  | 209 kJ   | Ecoinvent v3 | Electricity, medium voltage {US}   market group for electricity, medium voltage, Cut-off, S                                             |                            |

**Table S4.** Life Cycle Inventory for Scenario Z4.

| Material or energy                           | Quantity | Database     | Process Name                                                                                                                            | Comments                   |
|----------------------------------------------|----------|--------------|-----------------------------------------------------------------------------------------------------------------------------------------|----------------------------|
| <b>Output</b>                                |          |              |                                                                                                                                         |                            |
| Zein Sc Z4                                   | 1.0951 g |              |                                                                                                                                         |                            |
| Spent solvent                                | 240 g    | Ecoinvent v3 | Spent solvent mixture {RoW}  treatment of spent solvent mixture, hazardous waste incineration, with energy recovery, in the waste flows |                            |
| <b>Input</b>                                 |          |              |                                                                                                                                         |                            |
| Distillers Dried Grains with Solubles (DDGS) | 23.3 g   | Ecoinvent v3 | Distillers Dried Grains with Solubles {US}  ethanol production from maize   Cut-off, S                                                  |                            |
| Ethanol                                      | 176.84 g | Ecoinvent v3 | Ethanol without water in 95% solution state, from fermentation {US}   ethanol production from maize   Cut-off, S                        |                            |
| Water                                        | 63.16 g  | Ecoinvent v3 | Tap water {GLO}  market group for tap water   Cut-off, S                                                                                |                            |
| Sodium hydroxide                             | 0.35 g   | Ecoinvent v3 | Neutralising agent, sodium hydroxide-equivalent {GLO}  soda ash, dense, to generic market for neutralising agent   Cut-off, S           |                            |
| Disodium bisulfite                           | 0.7 g    | Ecoinvent v3 | Disodium disulphite {GLO}  market for disodium disulphite   Cut-off, S                                                                  | Proxy for sodium disulfite |
| Electricity                                  | 275 kJ   | Ecoinvent v3 | Electricity, medium voltage {US}   market group for electricity, medium voltage, Cut-off, S                                             |                            |

In the method described by Cheryan [3] the extraction of zein is from Distillers Dried Grains (DDGS) in US. It was assumed that 1 kg of corn produces 0.33 kg of DDGS [4]. It is mentioned that for 1 g of corn, 4 mL of solvent is added. It was considered the water required to precipitate the zein. The densities considered were for water  $1 \text{ g mL}^{-1}$  and ethanol  $0.78 \text{ g mL}^{-1}$ .

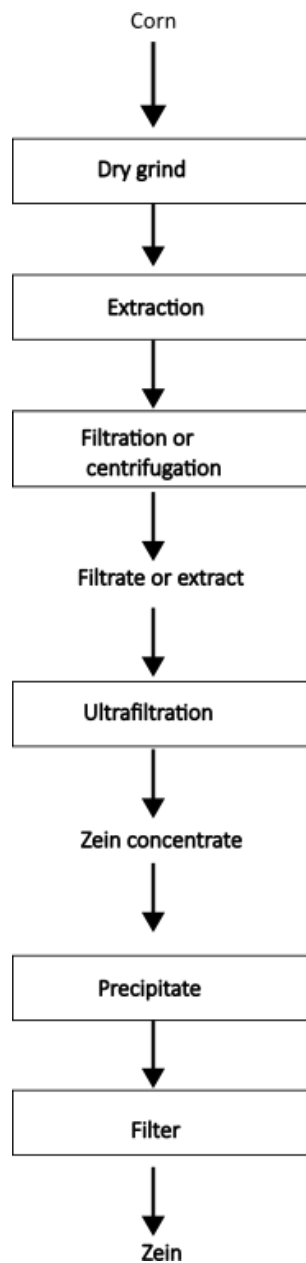

**Figure S2.** Schematic description of zein extraction from corn based on Cheryan method.

**Table S5.** Life Cycle Inventory for Scenario Z5.

| Material or energy                           | Quantity   | Database     | Process Name                                                                                                                            |
|----------------------------------------------|------------|--------------|-----------------------------------------------------------------------------------------------------------------------------------------|
| <b>Output</b>                                |            |              |                                                                                                                                         |
| Zein Sc Z5                                   | 0.03438 kg |              |                                                                                                                                         |
| Spent solvent                                | 6.351 kg   | Ecoinvent v3 | Spent solvent mixture {RoW}  treatment of spent solvent mixture, hazardous waste incineration, with energy recovery, in the waste flows |
| <b>Input</b>                                 |            |              |                                                                                                                                         |
| Distillers Dried Grains with Solubles (DDGS) | 0.333 kg   | Ecoinvent v3 | Distillers Dried Grains with Solubles {US}  ethanol production from maize   Cut-off, S                                                  |
| Ethanol                                      | 2.301 kg   | Ecoinvent v3 | Ethanol without water in 95% solution state, from fermentation {US}   ethanol production from maize   Cut-off, S                        |
| Water                                        | 4.05 kg    | Ecoinvent v3 | Tap water {GLO}  market group for tap water   Cut-off, S                                                                                |
| Electricity                                  | 10591 kJ   | Ecoinvent v3 | Electricity, medium voltage {US}   market group for electricity, medium voltage, Cut-off, S                                             |

**Table S6.** Life Cycle Inventory for Scenario Z6.

| Material or energy                           | Quantity  | Database     | Process Name                                                                                                                            |
|----------------------------------------------|-----------|--------------|-----------------------------------------------------------------------------------------------------------------------------------------|
| <b>Output</b>                                |           |              |                                                                                                                                         |
| Zein Sc Z6                                   | 0.0224 kg |              |                                                                                                                                         |
| Spent solvent                                | 8.223 kg  | Ecoinvent v3 | Spent solvent mixture {RoW}  treatment of spent solvent mixture, hazardous waste incineration, with energy recovery, in the waste flows |
| <b>Input</b>                                 |           |              |                                                                                                                                         |
| Distillers Dried Grains with Solubles (DDGS) | 0.333 kg  | Ecoinvent v3 | Distillers Dried Grains with Solubles {US}  ethanol production from maize   Cut-off, S                                                  |
| Ethanol                                      | 4.173 kg  | Ecoinvent v3 | Ethanol without water in 95% solution state, from fermentation {US}  ethanol production from maize   Cut-off, S                         |
| Water                                        | 4.05 kg   | Ecoinvent v3 | Tap water {GLO}  market group for tap water   Cut-off, S                                                                                |
| Electricity                                  | 12744 kJ  | Ecoinvent v3 | Electricity, medium voltage {US}   market group for electricity, medium voltage, Cut-off, S                                             |

**Table S7.** Life Cycle Inventory for Scenario Z7.

| Material or energy                           | Quantity | Database     | Process Name                                                                                                                            | Comments                   |
|----------------------------------------------|----------|--------------|-----------------------------------------------------------------------------------------------------------------------------------------|----------------------------|
| <b>Output</b>                                |          |              |                                                                                                                                         |                            |
| Zein Sc Z7                                   | 0.233 g  |              |                                                                                                                                         |                            |
| Spent solvent                                | 80 g     | Ecoinvent v3 | Spent solvent mixture {RoW}  treatment of spent solvent mixture, hazardous waste incineration, with energy recovery, in the waste flows |                            |
| <b>Input</b>                                 |          |              |                                                                                                                                         |                            |
| Distillers Dried Grains with Solubles (DDGS) | 23.3 g   | Ecoinvent v3 | Distillers Dried Grains with Solubles {US}  ethanol production from maize   Cut-off, S                                                  |                            |
| Isopropanol                                  | 70.4 g   | Ecoinvent v3 | Isopropanol {RoW}  market for isopropanol   Cut-off, S                                                                                  |                            |
| Water                                        | 9.6 g    | Ecoinvent v3 | Tap water {CA-QC}  market group for tap water   Cut-off, S                                                                              |                            |
| Sodium hydroxide                             | 0.35 g   | Ecoinvent v3 | Neutralising agent, sodium hydroxide-equivalent {GLO}  soda ash, dense, to generic market for neutralising agent   Cut-off, S           |                            |
| Disodium bisulfite                           | 0.7 g    | Ecoinvent v3 | Disodium disulphite {GLO}  market for disodium disulphite   Cut-off, S                                                                  | Proxy for sodium disulfite |
| Electricity                                  | 136.4 kJ | Ecoinvent v3 | Electricity, medium voltage {US}   market group for electricity, medium voltage, Cut-off, S                                             |                            |

**Table S8.** Life Cycle Inventory for Scenario Z8.

| Material or energy                           | Quantity | Database     | Process Name                                                                                                                            | Comments                   |
|----------------------------------------------|----------|--------------|-----------------------------------------------------------------------------------------------------------------------------------------|----------------------------|
| <b>Output</b>                                |          |              |                                                                                                                                         |                            |
| <b>Zein Sc Z8</b>                            | 0.233 g  |              |                                                                                                                                         |                            |
| Spent solvent                                | 24 g     | Ecoinvent v3 | Spent solvent mixture {RoW}  treatment of spent solvent mixture, hazardous waste incineration, with energy recovery, in the waste flows |                            |
| <b>Input</b>                                 |          |              |                                                                                                                                         |                            |
| Distillers Dried Grains with Solubles (DDGS) | 23.3 g   | Ecoinvent v3 | Distillers Dried Grains with Solubles {US}  ethanol production from maize   Cut-off, S                                                  |                            |
| Isopropanol                                  | 21.12 g  | Ecoinvent v3 | Isopropanol {RoW}  market for isopropanol   Cut-off, S                                                                                  |                            |
| Water                                        | 2.88 g   | Ecoinvent v3 | Tap water {CA-QC}  market group for tap water   Cut-off, S                                                                              |                            |
| Sodium hydroxide                             | 0.35 g   | Ecoinvent v3 | Neutralising agent, sodium hydroxide-equivalent {GLO}  soda ash, dense, to generic market for neutralising agent   Cut-off, S           |                            |
| Disodium bisulfite                           | 0.7 g    | Ecoinvent v3 | Disodium disulphite {GLO}  market for disodium disulphite   Cut-off, S                                                                  | Proxy for sodium disulfite |
| Electricity                                  | 209 kJ   | Ecoinvent v3 | Electricity, medium voltage {US}   market group for electricity, medium voltage, Cut-off, S                                             |                            |

**Table S9.** Life Cycle Inventory for Scenario Z9.

| Material or energy                           | Quantity | Database     | Process Name                                                                                                                            |
|----------------------------------------------|----------|--------------|-----------------------------------------------------------------------------------------------------------------------------------------|
| <b>Output</b>                                |          |              |                                                                                                                                         |
| Zein Sc Z9                                   | 0.0224kg |              |                                                                                                                                         |
| Spent solvent                                | 0.822 kg | Ecoinvent v3 | Spent solvent mixture {RoW}  treatment of spent solvent mixture, hazardous waste incineration, with energy recovery, in the waste flows |
| <b>Input</b>                                 |          |              |                                                                                                                                         |
| Distillers Dried Grains with Solubles (DDGS) | 0.333 kg | Ecoinvent v3 | Distillers Dried Grains with Solubles {US}  ethanol production from maize   Cut-off, S                                                  |
| Ethanol                                      | 0.417 kg | Ecoinvent v3 | Ethanol without water in 95% solution state, from fermentation {US}   ethanol production from maize   Cut-off, S                        |
| Water                                        | 0.405 kg | Ecoinvent v3 | Tap water {GLO}  market group for tap water   Cut-off, S                                                                                |
| Electricity                                  | 14896 kJ | Ecoinvent v3 | Electricity, medium voltage {US}   market group for electricity, medium voltage, Cut-off, S                                             |

### 1.2. Life Cycle Inventory for the fabrication of 1 kg of ethyl lactate (Scenario E1-E4)

The production of ethyl lactate was modeled as described by Argonne National Laboratory [5]. Since it is a document from USA tons were adjusted to USA ton to european tons to be used in SimaPro Software. The four scenarios considered were based in this process. The difference among them is the origin of lactic acid and ethanol. In Scenario **E1**, we consider both of them come from synthesis, Scenario **E2**, we consider ethanol and lactic acid come from corn grain, Scenario **E3**, ethanol comes from corn grain and lactic acid from the corn stover, and Scenario **E4**, both of them come from stalk.

| <i>Energy Input</i>      | <i>MMbtu/ton</i> |
|--------------------------|------------------|
| Natural gas <sup>a</sup> | 8.2              |
| Electricity <sup>a</sup> | 0.051            |
| <i>Material Inputs</i>   | <i>ton/ ton</i>  |
| L-lactic acid            | 0.81             |
| Ethanol                  | 0.42             |

**Figure S3.** Material and energy intensities for ethyl lactate by Argonne National Laboratory.

**Table S10.** Life Cycle Inventory for Scenario E1.

| <b>Material or energy</b> | <b>Quantity</b> | <b>Database</b> | <b>Process Name</b>                                                                                                      |
|---------------------------|-----------------|-----------------|--------------------------------------------------------------------------------------------------------------------------|
| <b>Output</b>             |                 |                 |                                                                                                                          |
| Ethyl lactate<br>Sc E1    | 1 ton           |                 |                                                                                                                          |
| <b>Input</b>              |                 |                 |                                                                                                                          |
| Lactic acid synthetic     | 0.81 ton        | Ecoinvent v3    | Lactic acid {GLO}   market for lactic acid   Cut-off, S                                                                  |
| Ethanol synthetic         | 0.421 ton       | Ecoinvent v3    | Ethanol without water in 99.7% solution state, from ethylene {RoW}   ethanol production, ethylene hydration   Cut-off, S |
| Heat                      | 8200000 Btu     | Ecoinvent v3    | Heat, central or small-scale, natural gas {RoW}   market for heat, central or small-scale, natural gas   Cut-off, S      |
| Electricity               | 51000 Btu       | Ecoinvent v3    | Electricity, medium voltage {US}   market group for electricity, medium voltage, Cut-off, S                              |

**Table S11.** Life Cycle Inventory for Scenario E2.

| <b>Material or energy</b>                | <b>Quantity</b> | <b>Database</b> | <b>Process Name</b>                                                                                                 |
|------------------------------------------|-----------------|-----------------|---------------------------------------------------------------------------------------------------------------------|
| <b>Output</b>                            |                 |                 |                                                                                                                     |
| Ethyl lactate<br>Sc E2                   | 1 ton           |                 |                                                                                                                     |
| <b>Input</b>                             |                 |                 |                                                                                                                     |
| Lactic acid<br>corn grain<br>(Manandhar) | 0.81 ton        |                 |                                                                                                                     |
| Ethanol                                  | 0.442 ton       | Ecoinvent<br>v3 | Ethanol without water in 95% solution state, from fermentation {US}   ethanol production from maize   Cut-off, S    |
| Heat                                     | 8200000<br>Btu  | Ecoinvent<br>v3 | Heat, central or small-scale, natural gas {RoW}   market for heat, central or small-scale, natural gas   Cut-off, S |
| Electricity                              | 51000<br>Btu    | Ecoinvent<br>v3 | Electricity, medium voltage {US}   market group for electricity, medium voltage, Cut-off, S                         |

**Table S12.** Inventory for the production of lactic acid from corn flour in US, based on Manandhar et al process.[6]

| <b>Material or energy</b>              | <b>Quantity</b> | <b>Database</b> | <b>Process Name</b>                                                                         |
|----------------------------------------|-----------------|-----------------|---------------------------------------------------------------------------------------------|
| <b>Output</b>                          |                 |                 |                                                                                             |
| Lactic acid<br>Manandhar et al process | 12.6 ton        |                 |                                                                                             |
| <b>Input</b>                           |                 |                 |                                                                                             |
| <b>Corn flour</b>                      | 19.6 ton        | Agri-footprint  | Maize flour, at processing {US}Economic, S                                                  |
| <b>Water</b>                           | 36.6 ton        | Ecoinvent v3    | Tap water {GLO}  market group for tap water   Cut-off, S                                    |
| <b>Alpha amylase</b>                   | 0.004 ton       | USLCI           | Enzyme, Alpha-amylase, Novozyme Liquozyme/kg/RER                                            |
| <b>Glucoamylase</b>                    | 0.016 ton       | USLCI           | Enzyme, Glucoamylase, Novozyme Spirizyme/kg/RER                                             |
| <b>Methanol</b>                        | 0.1 ton         | Ecoinvent v3    | Methanol {US}   market for methanol   Cut-off, S                                            |
| <b>Corn steep liquor</b>               | 0.3 ton         | USLCI           | Corn steep liquor/kg/RNA                                                                    |
| <b>Diammonium phosphate</b>            | 0.03 ton        | Ecoinvent v3    | Diammonium phosphate {CN} market for diammonium phosphate  Cut-off, S                       |
| <b>Steam</b>                           | 256 ton         | Ecoinvent v3    | Steam in chemical industry {RoW}   market for steam, in chemical industry   Cut-off, S      |
| <b>Electricity</b>                     | 4806 kWh        | Ecoinvent v3    | Electricity, medium voltage {US}   market group for electricity, medium voltage, Cut-off, S |

**Table S13.** Life Cycle Inventory for Scenario E3.

| <b>Material or energy</b>           | <b>Quantity</b> | <b>Database</b> | <b>Process Name</b>                                                                                                 |
|-------------------------------------|-----------------|-----------------|---------------------------------------------------------------------------------------------------------------------|
| <b>Output</b>                       |                 |                 |                                                                                                                     |
| Ethyl lactate<br>Sc E3              | 1 ton           |                 |                                                                                                                     |
| <b>Input</b>                        |                 |                 |                                                                                                                     |
| Lactic acid<br>corn stalk<br>(Wang) | 0.81 ton        |                 |                                                                                                                     |
| Ethanol                             | 0.442 ton       | Ecoinvent v3    | Ethanol without water in 95% solution state, from fermentation {US}   ethanol production from maize   Cut-off, S    |
| Heat                                | 8200000<br>Btu  | Ecoinvent v3    | Heat, central or small-scale, natural gas {RoW}   market for heat, central or small-scale, natural gas   Cut-off, S |
| Electricity                         | 51000<br>Btu    | Ecoinvent v3    | Electricity, medium voltage {US}   market group for electricity, medium voltage, Cut-off, S                         |

**Table S14.** Life Cycle Inventory for Scenario E4.

| <b>Material or energy</b>           | <b>Quantity</b> | <b>Database</b> | <b>Process Name</b>                                                                                                 |
|-------------------------------------|-----------------|-----------------|---------------------------------------------------------------------------------------------------------------------|
| <b>Output</b>                       |                 |                 |                                                                                                                     |
| Ethyl lactate<br>Sc E4              | 1 ton           |                 |                                                                                                                     |
| <b>Input</b>                        |                 |                 |                                                                                                                     |
| Lactic acid<br>corn stalk<br>(Wang) | 0.81 ton        |                 |                                                                                                                     |
| Ethanol corn<br>stalk<br>(Wang)     | 0.421 ton       |                 |                                                                                                                     |
| Heat                                | 8200000<br>Btu  | Ecoinvent v3    | Heat, central or small-scale, natural gas {RoW}   market for heat, central or small-scale, natural gas   Cut-off, S |
| Electricity                         | 51000<br>Btu    | Ecoinvent v3    | Electricity, medium voltage {US}   market group for electricity, medium voltage, Cut-off, S                         |

**Table S15.** Inventory for the production of lactic acid from corn stover in US, based on Wang et al. Process [7].

**Assumption:** Corn stover was a substitute for corn stalk due to the availability in the software.

| Material or energy   | Quantity  | Database     | Process Name                                                                                                                  |
|----------------------|-----------|--------------|-------------------------------------------------------------------------------------------------------------------------------|
| <b>Output</b>        |           |              |                                                                                                                               |
| Lactic acid          | 70.61 g   |              |                                                                                                                               |
| Wang et al. Process. |           |              |                                                                                                                               |
| Ethanol              | 135.56 g  |              |                                                                                                                               |
| Wang et al. Process. |           |              |                                                                                                                               |
| <b>Input</b>         |           |              |                                                                                                                               |
| Corn stover          | 1 kg      | USLCI        | Corn stover, production, average, US, 2022/kg/RNA                                                                             |
| Sodium hydroxide     | 0.1853 kg | Ecoinvent v3 | Neutralising agent, sodium hydroxide-equivalent {GLO}  soda ash, dense, to generic market for neutralising agent   Cut-off, S |
| Water                | 19 kg     | Ecoinvent v3 | Tap water {CA-QB}  market group for tap water   Cut-off, S                                                                    |
| Enzyme               | 0.236 kg  | USLCI        | Enzyme, cellulase, Novozyme Celluclast/kg/RER                                                                                 |
| Corn steep liquor    | 0.147kg   | USLCI        | Corn steep liquor/kg/RNA                                                                                                      |
| Electricity          | 1.45 MJ   | Ecoinvent v3 | Electricity, medium voltage {US}   market group for electricity, medium voltage, Cut-off, S                                   |

### 1.3. Life Cycle Inventory for the fabrication of 1 m<sup>2</sup> zein membrane (Scenario M1-M3)

The membrane fabrication process was based on our previous paper [8] and the energy was previously reported [9] .

**Table S16.** Life Cycle Inventory for Scenario M1.

| <b>Material or energy</b> | <b>Quantity</b>  |
|---------------------------|------------------|
| <b>Output</b>             |                  |
| Zein membrane<br>Sc M1    | 1 m <sup>2</sup> |
| <b>Input</b>              |                  |
| Ethyl lactate<br>Sc E3    | 122.74 g         |
| Zein Sc Z2                | 37.26 g          |
| Electricity               | 0.0124 kWh       |

---

**Table S17.** Life Cycle Inventory for Scenario M2.

| <b>Material or energy</b> | <b>Quantity</b>  |
|---------------------------|------------------|
| <b>Output</b>             |                  |
| Zein membrane<br>Sc M2    | 1 m <sup>2</sup> |
| <b>Input</b>              |                  |
| Ethyl lactate<br>Sc E3    | 122.74 g         |
| Zein Sc Z4                | 37.26 g          |
| Electricity               | 0.0124 kWh       |

---

**Table S18.** Life Cycle Inventory for Scenario M3.

| <b>Material or energy</b> | <b>Quantity</b>  |
|---------------------------|------------------|
| <b>Output</b>             |                  |
| Zein membrane<br>Sc M3    | 1 m <sup>2</sup> |
| <b>Input</b>              |                  |
| Ethyl lactate<br>Sc E3    | 122.74 g         |
| Zein Sc Z9                | 37.26 g          |
| Electricity               | 0.0124 kWh       |

---

## 2. Life cycle Impact Assessment (LCIA)

### 2.1. Life Cycle Impact Assessment for the extraction of 1 kg of zein (Scenario Z1-Z9)

**Table S19.** Global warming potential in kg CO<sub>2</sub> eq.

| Scenario | Feedstock | Solvent   | Tap water | Neutralizing agent | Reductant | Electricity | Spent solvent mixture |
|----------|-----------|-----------|-----------|--------------------|-----------|-------------|-----------------------|
| Sc Z1    | 3.5501    | 135.9675  | 0.00114   | 0.1132             | 0.19208   | 3.3471      | 89.0072               |
| Sc Z2    | 2.3992    | 41.4813   | 0.00169   | 0.0765             | 0.12981   | 2.2621      | 60.1551               |
| Sc Z3    | 2.1113    | 3151.1802 | 0.02646   | 2.6235             | 4.45154   | 77.5730     | 2062.8295             |
| Sc Z4    | 0.4492    | 302.6538  | 0.01234   | 0.5582             | 0.94714   | 16.5048     | 438.8999              |
| Sc Z5    | 0.2045    | 125.4383  | 0.10613   |                    |           | 40.8209     | 369.9511              |
| Sc Z6    | 0.3138    | 349.1560  | 0.16289   |                    |           | 75.3893     | 735.1743              |
| Sc Z7    | 2.1113    | 1050.3934 | 0.00882   | 2.6235             | 4.45154   | 77.573      | 687.6098              |
| Sc Z8    | 2.1113    | 315.1180  | 0.00265   | 2.6235             | 4.45154   | 77.573      | 206.2829              |
| Sc Z9    | 0.3138    | 26.7660   | 0.01628   |                    |           | 88.119      | 73.4906               |

**Table S20.** Land use in m<sup>2</sup>a crop eq.

| Scenario | Feedstock | Solvent  | Tap water | Neutralizing agent | Reductant | Electricity | Spent solvent mixture |
|----------|-----------|----------|-----------|--------------------|-----------|-------------|-----------------------|
| Sc Z1    | 4.5997    | 2.7107   | 1.78E-04  | 0.00284            | 0.00588   | 0.0787      | 0.1818                |
| Sc Z2    | 3.1087    | 62.7537  | 2.63E-04  | 0.00192            | 0.00397   | 0.0532      | 0.1228                |
| Sc Z3    | 3.1941    | 62.8247  | 0.00411   | 0.06583            | 0.1362    | 1.8246      | 4.2136                |
| Sc Z4    | 0.6796    | 457.8596 | 0.00192   | 0.01401            | 0.02898   | 0.3882      | 0.8965                |
| Sc Z5    | 0.3093    | 189.7651 | 0.00244   |                    |           | 0.9601      | 0.7556                |
| Sc Z6    | 0.4748    | 528.2093 | 0.003748  |                    |           | 1.7732      | 1.5017                |
| Sc Z7    | 3.1941    | 20.9415  | 0.00137   | 0.06583            | 0.1362    | 1.8246      | 1.4045                |
| Sc Z8    | 3.1941    | 6.2824   | 4.11E-04  | 0.06583            | 0.1362    | 1.8246      | 0.4213                |
| Sc Z9    | 0.4748    | 40.2290  | 0.00374   |                    |           | 2.0726      | 0.1501                |

**Table S21.** Water consumption in m<sup>3</sup>.

| Scenario | Feedstock | Solvent | Tap water | Neutralizing agent | Reductant | Electricity | Spent solvent mixture |
|----------|-----------|---------|-----------|--------------------|-----------|-------------|-----------------------|
| Sc Z1    | 0.22011   | 0.7305  | 5.40E-03  | 0.0012             | 0.00209   | 0.0221      | 0.0859                |
| Sc Z2    | 0.14876   | 1.4660  | 8.00E-03  | 8.14E-04           | 0.00141   | 0.0149      | 0.0580                |
| Sc Z3    | 0.07462   | 16.9304 | 0.12506   | 0.0279             | 0.04838   | 0.5131      | 1.9919                |
| Sc Z4    | 0.01588   | 10.6962 | 0.05835   | 0.00594            | 0.01029   | 0.1091      | 0.4238                |
| Sc Z5    | 0.00722   | 4.4331  | 0.11775   |                    |           | 0.2701      | 0.3572                |
| Sc Z6    | 0.01193   | 12.3397 | 0.18074   |                    |           | 0.49866     | 0.7099                |
| Sc Z7    | 0.07462   | 5.6434  | 0.04169   | 0.0279             | 0.04838   | 0.5131      | 0.6639                |
| Sc Z8    | 0.07462   | 1.6930  | 1.25E-02  | 0.0279             | 0.04838   | 0.5131      | 0.1991                |
| Sc Z9    | 0.01109   | 1.7323  | 0.01807   |                    |           | 0.5828      | 0.0709                |

**Table S22.** Global warming potential in kg CO<sub>2</sub> eq.

| Scenario | Feedstock | Solvent    | Tap water | Neutralizing agent | Reductant | Electricity | Spent solvent mixture |
|----------|-----------|------------|-----------|--------------------|-----------|-------------|-----------------------|
| Sc Z3    | 2.11138   | 3151.18025 | 0.02646   | 2.62355            | 4.45154   | 77.573      | 2062.8295             |
| Sc Z7    | 2.11138   | 1050.39342 | 0.00882   | 2.62355            | 4.45154   | 77.573      | 687.6098              |
| Sc Z8    | 2.11138   | 315.11803  | 0.00265   | 2.62355            | 4.45154   | 77.573      | 206.2829              |
| Sc Z6    | 0.31388   | 349.1562   | 0.1628    |                    |           | 75.38933    | 735.1743              |
| Sc Z9    | 0.3138    | 26.7668    | 0.01628   |                    |           | 88.1198     | 73.4906               |

## 2.2. Life cycle Impact Assessment (LCIA) for the fabrication of 1 kg of ethyl lactate (Scenario E1-E4)

**Table S23.** Global warming potential in kg CO<sub>2</sub> eq.

| Scenario | Ethanol | Lactic acid | Heat | Electricity |
|----------|---------|-------------|------|-------------|
| Sc E1    | 0.8     | 4.32        | 0.72 | 0.07        |
| Sc E2    | 0.83    | 6.7         | 0.72 | 0.07        |
| Sc E3    | 0.83    | 5.97        | 0.72 | 0.07        |
| Sc E4    | 2.99    | 5.97        | 0.72 | 0.07        |

**Table S24.** Land use in m<sup>2</sup>a crop eq.

| Scenario | Ethanol | Lactic acid | Heat    | Electricity |
|----------|---------|-------------|---------|-------------|
| Sc E1    | 0.0208  | 0.07841     | 0.00329 | 0.000168    |
| Sc E2    | 1.25322 | 1.43583     | 0.00329 | 0.000168    |
| Sc E3    | 1.25322 | 2.61828     | 0.00329 | 0.000168    |
| Sc E4    | 1.31329 | 2.61828     | 0.00329 | 0.000168    |

**Table S25.** Water consumption in m<sup>3</sup>.

| Scenario | Ethanol | Lactic acid | Heat     | Electricity |
|----------|---------|-------------|----------|-------------|
| Sc E1    | 0.00377 | 0.03966     | 5.51E-04 | 4.72E-04    |
| Sc E2    | 0.02928 | 0.06774     | 5.51E-04 | 4.72E-04    |
| Sc E3    | 0.02928 | 0.11736     | 5.51E-04 | 4.72E-04    |
| Sc E4    | 0.05887 | 0.11736     | 5.51E-04 | 4.72E-04    |

### 2.3. Life Cycle Impact Assessment for the fabrication of 1 m<sup>2</sup> of zein membrane (Scenario M1-M3)

**Table S26.** Global warming potential in kg CO<sub>2</sub> eq.

| Scenario | Zein     | Ethyl lactate | Electricity |
|----------|----------|---------------|-------------|
| Sc M1    | 3.96841  | 0.92295       | 0.00592     |
| Sc M2    | 28.31036 | 0.92295       | 0.00592     |
| Sc M3    | 7.03124  | 0.92295       | 0.00592     |

**Table S27.** Land use in m<sup>2</sup>a crop eq.

| Scenario | Zein  | Ethyl lactate | Electricity |
|----------|-------|---------------|-------------|
| Sc M1    | 2.46  | 0.47561       | 1.39134E-4  |
| Sc M2    | 17.15 | 0.47561       | 1.39134E-4  |
| Sc M3    | 1.59  | 0.47561       | 1.39134E-4  |

**Table S28.** Water consumption in m<sup>3</sup>.

| <b>Scenario</b> | <b>Zein</b> | <b>Ethyl lactate</b> | <b>Electricity</b> |
|-----------------|-------------|----------------------|--------------------|
| Sc M1           | 0.063       | 0.01807              | 3.91265E-5         |
| Sc M2           | 0.425       | 0.01807              | 3.91265E-5         |
| Sc M3           | 0.089       | 0.01807              | 3.91265E-5         |

### 3. References

1. Anderson, T. J. & Lamsal, B. P. Development of New Method for Extraction of  $\alpha$ -Zein from Corn Gluten Meal Using Different Solvents. *Cereal Chem.* **88**, 356–362 (2011). <https://doi.org/10.1094/CCHEM-08-10-0117>
2. Anderson, T. J., Ilankovan, P. & Lamsal, B. P. Two fraction extraction of  $\alpha$ -zein from DDGS and its characterization. *Ind. Crops Prod.* **37**, 466–472 (2012). <https://doi.org/10.1016/j.indcrop.2011.07.022>
3. Cheryan, M. Method and system for extraction of zein from corn (2002). <https://patents.google.com/patent/US7045607B2/en>
4. Liaw, J.D., Bajwa, D. S., Shojaeiarani, J., Bajwa, S.G. Corn distiller's dried grains with solubles (DDGS) - A value added functional material for wood composites. *Ind. Crops Prod.* **139**, 111525 (2019). <https://doi.org/10.1016/j.indcrop.2019.11152>
5. Dunn, J. B., Adom, F., Sather, N., Han, J., & Snyder, S. *Life-Cycle Analysis of Bioproducts and Their Conventional Counterparts in GREET*. ANL/ESD--14/9 Rev., 1250468 (2015). <http://www.osti.gov/servlets/purl/1250468/>
6. Manandhar, A. & Shah, A. Techno-Economic Analysis of Bio-Based Lactic Acid Production Utilizing Corn Grain as Feedstock. *Processes* **8**, 199 (2020). <https://doi.org/10.3390/pr8020199>
7. Wang, Y., Liu, J., Cai, D. & Zhao, G. Co-generation of ethanol and L-lactic acid from corn stalk under a hybrid process. *Biotechnol Biofuels* **11**, 331 (2018). <https://doi.org/10.1186/s13068-018-1330-6>
8. Oviedo, C., Oldal, D., Hardian, R., Holtzl, T., Serag, M. F., Habuchi, S., & Szekely, G. Harnessing macromolecular crowding of proteins for engineering sustainable nanofiltration membranes, *SusMat*, in press (2026).
9. Rajendran, N., Runge, T., Bergman, R. D., Nepal, P., Alikhani, N., Li, L., O'Neill, S.R., Wang, J. Techno-economic analysis and life cycle assessment of manufacturing a cellulose nanocrystal-based hybrid membrane, *Sustain. Prod. Consum.* **40**, 503–515 (2023). <https://doi.org/10.1016/j.spc.2023.07.014>
